# Supplementary material for: Dimethyl Sulfoxide-Free Cryopreservation of Human Umbilical Cord Mesenchymal Stem Cells Based on Zwitterionic Betaine and Electroporation
Source: MDPI journal article supplement (doi:10.3390/ijms22147445), 2021-07-12
Supplement: s1 [file s1]

## Supporting Information

### Dimethyl Sulfoxide-Free Cryopreservation of Human Umbilical Cord

### Mesenchymal Stem Cells Based on Zwitterionic Betaine and Electroporation

Lei Gao<sup>a,b,c,d</sup>, Qianqian Zhou<sup>a</sup>, Yulong Zhang<sup>a</sup>, Sujing Sun<sup>a</sup>, Liping Lv<sup>a</sup>, Ping Ma<sup>a</sup>,

Jing Yang<sup>b,c,d</sup>, Min Liu<sup>b,c,d</sup>, Lei Zhang<sup>b,c,d,\*</sup>, Xiaohui Wang<sup>a,\*</sup>, Linsheng Zhan<sup>a,\*</sup>

<sup>a</sup>Department of Emerging Transfusion Technology, Institute of Health Service and Transfusion Medicine, Academy of Military Medical Sciences, Beijing, 100850, People's Republic of China

<sup>b</sup>Department of Biochemical Engineering, School of Chemical Engineering and Technology, Tianjin University, Tianjin 300350, P.R. China

<sup>c</sup>School of Chemical Engineering and Technology, Frontier Science Center for Synthetic Biology and Key Laboratory of Systems Bioengineering (MOE), Tianjin University, Tianjin 300350, P. R. China

<sup>d</sup>Qingdao Institute for Marine Technology of Tianjin University, Qingdao 266235, P. R. China

#### \*Corresponding Author:

E-mail: Lei Zhang: [lei\\_zhang@tju.edu.cn](mailto:lei_zhang@tju.edu.cn)  
Xiaohui Wang: [lovechina1980@163.com](mailto:lovechina1980@163.com)  
Linsheng Zhan: [lszhan91@yahoo.com](mailto:lszhan91@yahoo.com)

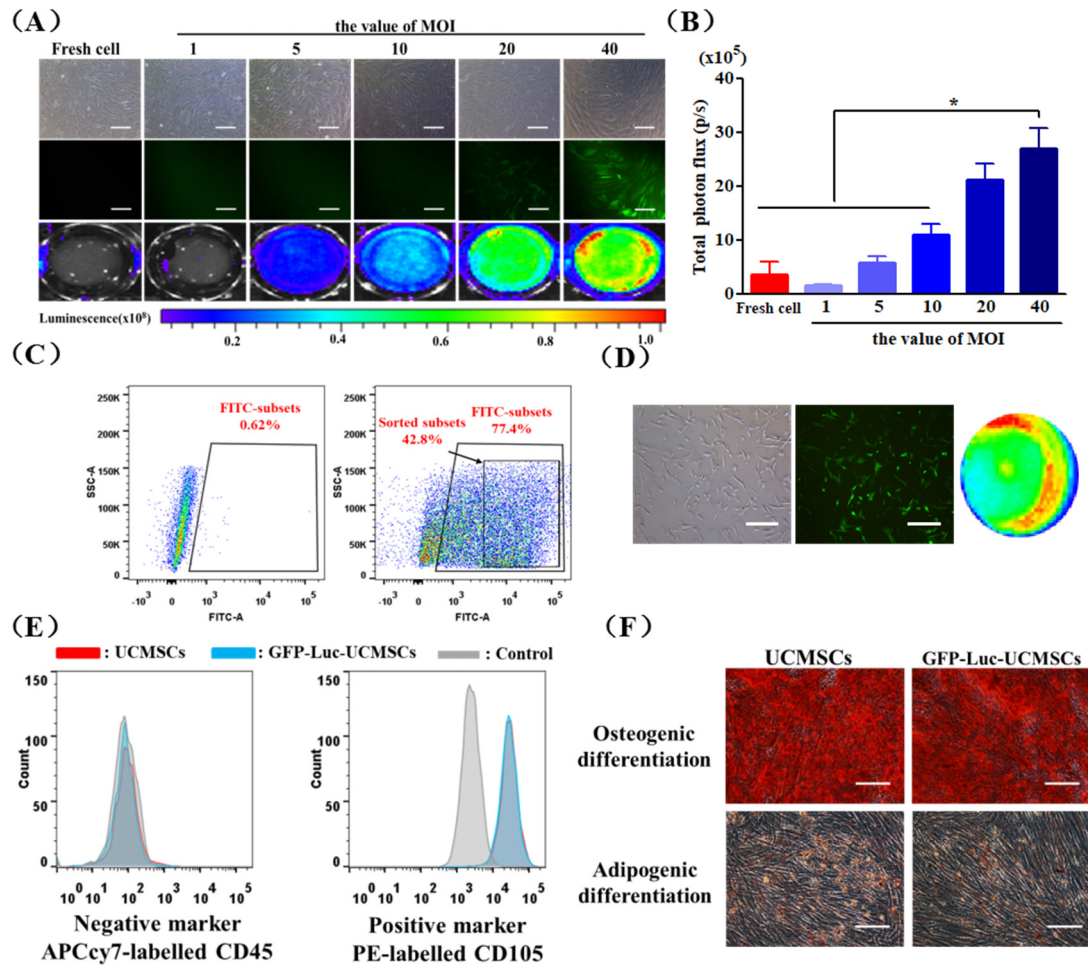

Figure S1. Construction of GFP-Fluc-UCMSCs. (A) Fluorescent images and bioluminescence images of UCMSCs transfected at different MOI value. (B) Bioluminescence intensity of UCMSCs transfected at different MOI value. (C) Flow cytometry dot plots of GFP-Fluc-UCMSCs sorting. (D) Microscopic images, fluorescent images and bioluminescence images of GFP-Fluc-UCMSCs. (E) CD45/105 expression of UCMSCs and GFP-Fluc-UCMSCs. (F) Osteogenic and adipogenic differentiation of UCMSCs and GFP-Fluc-UCMSCs. Scale bar= 200  $\mu$ m.

Value = mean  $\pm$  standard deviation,  $n \geq 3$ . \* $P < 0.05$ .
